# Supplementary material for: Efficacy and safety of fluticasone furoate 100 μg and 200 μg once daily in the treatment of moderate-severe asthma in adults and adolescents: a 24-week randomised study
Source: PubMed Central journal article supplement (PMC4107726; doi:10.1186/1471-2466-14-113), 2014-07-09
Supplement: 1471-2466-14-113-S2.pdf [file 1471-2466-14-113-S2.pdf]

**LIST OF INVESTIGATIONAL SITES AND IECs/IRBs FOR FFA114496**

| <b>Description of Research Facility,<br/>Hospital/ Institution, and Address</b>               | <b>Name of IEC/INSTITUTIONAL<br/>REVIEW BOARD Committee,<br/>Address, Committee Chair</b>                                                        |
|-----------------------------------------------------------------------------------------------|--------------------------------------------------------------------------------------------------------------------------------------------------|
| <b>Argentina</b>                                                                              |                                                                                                                                                  |
| INSARES, José Rondeau 335,<br>Mendoza, Mendoza, M5500CCG,<br>Argentina                        | Fundación CIDEA, Billinghurst<br>1677, CABA, C1425DTG,<br>Argentina<br><br>Chairperson: Díaz Couselo,<br>Fernando A.                             |
| Centro Médico Dra De Salvo,<br>Avenida Cabildo 1548 1°A, Buenos<br>Aires, C1426ABO, Argentina | Comité Independiente de Ética<br>para Ensayos en Farmacología<br>Clínica del Centro Médico Dra.<br>De Salvo<br><br>Chairperson: Miranda, Adriana |

| Description of Research Facility, Hospital/ Institution, and Address                                               | Name of IEC/INSTITUTIONAL REVIEW BOARD Committee, Address, Committee Chair                                                                                                 |
|--------------------------------------------------------------------------------------------------------------------|----------------------------------------------------------------------------------------------------------------------------------------------------------------------------|
| <p>CIDEA, 3er Cuerpo - 2do Subsuelo, Paraguay 2035, Buenos Aires, C1121ABE, Argentina</p>                          | <p>CEIFyC – Comité de Ética en Investigación Clínica de La Federación de Círculos Católicos de Obreros y Fundación CIDEA</p> <p>Chairperson: Díaz Couselo, Fernando A.</p> |
| <p>Investigaciones en Patologías Respiratorias, Balcarce 874, San Miguel de Tucumán, Tucumán., 4000, Argentina</p> | <p>CIEM NOA, 4th floor Las Piedras 496, San Miguel de Tucuman, Tucumán, Argentina</p> <p>Chairperson: Zarba, Juan</p>                                                      |
| <p>Instituto InAER, Arenales 3146 - Piso 1 Depto B, Buenos Aires, C1425BEN, Argentina</p>                          | <p>Instituto InAER, Arenales 3146 - Piso 1 Depto B, Buenos Aires, C1425BEN, Argentina</p> <p>Chairperson: Cerezo, Gustavo</p>                                              |

| Description of Research Facility,<br>Hospital/ Institution, and Address                                                                            | Name of IEC/INSTITUTIONAL<br>REVIEW BOARD Committee,<br>Address, Committee Chair                                                                                     |
|----------------------------------------------------------------------------------------------------------------------------------------------------|----------------------------------------------------------------------------------------------------------------------------------------------------------------------|
| <b>Chile</b>                                                                                                                                       |                                                                                                                                                                      |
| Hospital Carlos Van Buren, San Ignacio 725, Valparaiso, Valparaíso, 2341131, Chile                                                                 | Comité de Evaluación Ético Científico, Quinto Piso, Avenida Brasil #1435, Valparaíso, Chile<br><br>Chairperson: Weiss, Fernando                                      |
| CIMER - Centro de Investigaciones Médicas Respiratorias, José Manuel Infante 620 - Providencia, Santiago, Región Metro De Santiago, 7500800, Chile | Comité de Etica Cientifico del Servicio de Salud Metropolitano Oriente, Av. Salvador 364, Providencia / Santiago, 7500922, Chile<br><br>Chairperson: Stuardo, Andrés |
| Hospital Dr Sotero del Rio, Av. Concha y Toro 3459, Puente Alto - Santiago, Región Metro De Santiago, 8207257, Chile                               | Comité de Evaluación Ético Científico SSMSO, Av. Concha y Toro #3459 - Puente Alto, Santiago, 8207257, Chile<br><br>Chairperson: Michaud, Patricio                   |

| Description of Research Facility, Hospital/ Institution, and Address                       | Name of IEC/INSTITUTIONAL REVIEW BOARD Committee, Address, Committee Chair                                                                        |
|--------------------------------------------------------------------------------------------|---------------------------------------------------------------------------------------------------------------------------------------------------|
| <b>France</b>                                                                              |                                                                                                                                                   |
| CM51000 Body, Cabinet Médical, 10 quai Eugène Perret, Chalons en Champagne, 51000, France* | <p>CPP Nord Ouest I - CHU de Rouen, Pavillon de l'Aubette, 1 rue de Germont, Rouen Cedex, 76031, France</p> <p>Chairperson: Delangre, Thierry</p> |
| CM44300 Boye, Cabinet Médical, 63, rue de la Bottière, Nantes, 44300, France*              | <p>CPP Nord Ouest I - CHU de Rouen, Pavillon de l'Aubette, 1 rue de Germont, Rouen Cedex, 76031, France</p> <p>Chairperson: Delangre, Thierry</p> |

| Description of Research Facility,<br>Hospital/ Institution, and Address                                      | Name of IEC/INSTITUTIONAL<br>REVIEW BOARD Committee,<br>Address, Committee Chair                                                                    |
|--------------------------------------------------------------------------------------------------------------|-----------------------------------------------------------------------------------------------------------------------------------------------------|
| CM44140 Hulot De Collart, Cabinet<br>Médical, 6 rue de la Filée,<br>Aigrefeuille Sur Maine, 44140,<br>France | CPP Nord Ouest I - CHU de<br>Rouen, Pavillon de l'Aubette, 1<br>rue de Germont, Rouen Cedex,<br>76031, France<br><br>Chairperson: Delangre, Thierry |
| CM02000 Klink, Cabinet Médical, 2<br>bis rue Gabriel Péri, Laon, 02000,<br>France*                           | CPP Nord Ouest I - CHU de<br>Rouen, Pavillon de l'Aubette, 1<br>rue de Germont, Rouen Cedex,<br>76031, France<br><br>Chairperson: Delangre, Thierry |
| CM35890 Lemarie, Cabinet Médical,<br>8, rue des Nouettes, Bourg Des<br>Comptes, 35890, France*               | CPP Nord Ouest I - CHU de<br>Rouen, Pavillon de l'Aubette, 1<br>rue de Germont, Rouen Cedex,<br>76031, France<br><br>Chairperson: Delangre, Thierry |

|                                                                                            |                                                                                                                                                     |
|--------------------------------------------------------------------------------------------|-----------------------------------------------------------------------------------------------------------------------------------------------------|
| CM56000 Lemoine, Cabinet Médical,<br>15, Place de la République,<br>Vannes, 56000, France* | CPP Nord Ouest I - CHU de<br>Rouen, Pavillon de l'Aubette, 1<br>rue de Germont, Rouen Cedex,<br>76031, France<br><br>Chairperson: Delangre, Thierry |
|--------------------------------------------------------------------------------------------|-----------------------------------------------------------------------------------------------------------------------------------------------------|

| <b>Description of Research Facility,<br/>Hospital/ Institution, and Address</b>                                                       | <b>Name of IEC/INSTITUTIONAL<br/>REVIEW BOARD Committee,<br/>Address, Committee Chair</b>                                                                           |
|---------------------------------------------------------------------------------------------------------------------------------------|---------------------------------------------------------------------------------------------------------------------------------------------------------------------|
| <b>Mexico</b>                                                                                                                         |                                                                                                                                                                     |
| Hospital del Niño de Alta<br>Especialidad, Centro de Asma,<br>Méndez 2832 Colonia Tamulté,<br>Villahermosa, Tabasco, 86100,<br>Mexico | Comité Bioético para la<br>Investigación Clínica S.C., Puebla<br># 422-4 Colonia Roma, Mexico<br>City, 06700, Mexico<br><br>Chairperson: Ovadia-Savariego,<br>Celia |
| Hospital Angeles Lindavista, Torre<br>de Consultorios, Río Bamba 639 Col.<br>Magdalena de las Salinas, Mexico<br>City, 07760, Mexico  | Comite Bioetico para la<br>Investigación Clínica, Puebla #<br>422 -4, Colonia Roma, 07760,<br>Mexico<br><br>Chairperson: Ovadia-Savariego,<br>Celia                 |

| Description of Research Facility, Hospital/ Institution, and Address                                                          | Name of IEC/INSTITUTIONAL REVIEW BOARD Committee, Address, Committee Chair                                                                                                                |
|-------------------------------------------------------------------------------------------------------------------------------|-------------------------------------------------------------------------------------------------------------------------------------------------------------------------------------------|
| <b>Russian Federation</b>                                                                                                     |                                                                                                                                                                                           |
| Kazan Research Institute of Epidemiology and Microbiology MoH RF, 67 Bolshaya Krasnaya ul., Kazan, 420015, Russian Federation | Kazan Scientific Research Institution of Epidemiology and Microbiology of Rospotrebnadzor, 67, Bolshaya Krasnaya Street Kazan, 420015, Russian Federation<br>Chairperson: Andreev, Sergey |
| Municipal children hospital 4, 33, Dimitrova street, Novokuznetsk, 654063, Russian Federation                                 | Novokuznetsk Municipal Children Hospital 4, 33, Dimitrova street, 654063, Novokuznetsk, Russian Federation<br>Chairperson: Domanskaya, Olga                                               |

| <b>Description of Research Facility,<br/>Hospital/ Institution, and Address</b>                                  | <b>Name of IEC/INSTITUTIONAL<br/>REVIEW BOARD Committee,<br/>Address, Committee Chair</b>                                                              |
|------------------------------------------------------------------------------------------------------------------|--------------------------------------------------------------------------------------------------------------------------------------------------------|
| City Hospital #2, Pulmonolgy<br>department, Admiralskogo street, 6,<br>Pyatigorsk, 357538, Russian<br>Federation | Ethics Committee of City Hospital<br>#, 6, Admiralskogo Street,<br>Pyatigorsk, 357538, Russian<br>Federation<br><br>Chairperson: Temirov, Igor         |
| Penza City Clinical Hospital #4, 1,<br>Svetlaya street, Penza, 440067,<br>Russian Federation                     | Penza Institute of Advanced<br>Medical Studies, 8a, Stasova<br>street, Penza, 440060, Russian<br>Federation<br><br>Chairperson: Iskenderov,<br>Bakhram |



| <b>Description of Research Facility,<br/>Hospital/ Institution, and Address</b>                                  | <b>Name of IEC/INSTITUTIONAL<br/>REVIEW BOARD Committee,<br/>Address, Committee Chair</b>                                                           |
|------------------------------------------------------------------------------------------------------------------|-----------------------------------------------------------------------------------------------------------------------------------------------------|
| <b>United States</b>                                                                                             |                                                                                                                                                     |
| Clinical Research Institute, Inc., Suite<br>435, 2805 Campus Drive, Plymouth,<br>Minnesota, 55441, United States | Quorum Review Institutional<br>Review Board, Suite 1000, 1601<br>Fifth Avenue, Seattle, 98101,<br>United States<br><br>Chairperson: Simpson, Philip |

| <b>Description of Research Facility,<br/>Hospital/ Institution, and Address</b>                                 | <b>Name of IEC/INSTITUTIONAL<br/>REVIEW BOARD Committee,<br/>Address, Committee Chair</b>                                                           |
|-----------------------------------------------------------------------------------------------------------------|-----------------------------------------------------------------------------------------------------------------------------------------------------|
| Georgia Pollens Clinical Research<br>Center, Inc., 105 Spanish Ct.,<br>Albany, Georgia, 31707, United<br>States | Quorum Review Institutional<br>Review Board, Suite 1000, 1601<br>Fifth Avenue, Seattle, 98101,<br>United States<br><br>Chairperson: Simpson, Philip |
| IPS Research Company, 1111 North<br>Lee, Suite 400, Oklahoma City,<br>Oklahoma, 73103, United States            | Quorum Review Institutional<br>Review Board, Suite 1000, 1601<br>Fifth Avenue, Seattle, 98101,<br>United States<br><br>Chairperson: Simpson, Philip |

| <b>Description of Research Facility,<br/>Hospital/ Institution, and Address</b>                                              | <b>Name of IEC/INSTITUTIONAL<br/>REVIEW BOARD Committee,<br/>Address, Committee Chair</b>                                                           |
|------------------------------------------------------------------------------------------------------------------------------|-----------------------------------------------------------------------------------------------------------------------------------------------------|
| Clinical Research Specialist,<br>Building 6, Suite 20, 3939 Houma<br>Boulevard, Metairie, Louisiana,<br>70006, United States | Quorum Review Institutional<br>Review Board, Suite 1000, 1601<br>Fifth Avenue, Seattle, 98101,<br>United States<br><br>Chairperson: Simpson, Philip |
| Ocean Allergy & Respiratory<br>Research Center, 1673 Highway 88<br>W, Brick, New Jersey, 08724, United<br>States*            | Quorum Review Institutional<br>Review Board, Suite 1000, 1601<br>Fifth Avenue, Seattle, 98101,<br>United States<br><br>Chairperson: Simpson, Philip |
| Community Research of South<br>Florida, 7100 West 20th Avenue,<br>Hialeah, Florida, 33016, United<br>States*                 | Quorum Review Institutional<br>Review Board, Suite 1000, 1601<br>Fifth Avenue, Seattle, 98101,<br>United States<br><br>Chairperson: Simpson, Philip |

| <b>Description of Research Facility,<br/>Hospital/ Institution, and Address</b>                                            | <b>Name of IEC/INSTITUTIONAL<br/>REVIEW BOARD Committee,<br/>Address, Committee Chair</b>                                                           |
|----------------------------------------------------------------------------------------------------------------------------|-----------------------------------------------------------------------------------------------------------------------------------------------------|
| Allergy and Respiratory Center, 4048<br>Dressler Road NW, Canton, Ohio,<br>44718, United States                            | Quorum Review Institutional<br>Review Board, Suite 1000, 1601<br>Fifth Avenue, Seattle, 98101,<br>United States<br><br>Chairperson: Simpson, Philip |
| New Horizons Clinical Research,<br>LLC, 4260 Glendale Milford Road<br>Suite 201, Cincinnati, Ohio, 45242,<br>United States | Quorum Review Institutional<br>Review Board, Suite 1000, 1601<br>Fifth Avenue, Seattle, 98101,<br>United States<br><br>Chairperson: Simpson, Philip |

| <b>Description of Research Facility,<br/>Hospital/ Institution, and Address</b>                                             | <b>Name of IEC/INSTITUTIONAL<br/>REVIEW BOARD Committee,<br/>Address, Committee Chair</b>                                                           |
|-----------------------------------------------------------------------------------------------------------------------------|-----------------------------------------------------------------------------------------------------------------------------------------------------|
| St Elizabeth Childrens Health Center,<br>2212 Genesee Street, Utica, New<br>York, 13502, United States*                     | Quorum Review Institutional<br>Review Board, Suite 1000, 1601<br>Fifth Avenue, Seattle, 98101,<br>United States<br><br>Chairperson: Simpson, Philip |
| Southern California Clinical Trials,<br>Suite 111, 1501 Superior Ave,<br>Newport Beach, California, 92663,<br>United States | Quorum Review Institutional<br>Review Board, Suite 1000, 1601<br>Fifth Avenue, Seattle, 98101,<br>United States<br><br>Chairperson: Simpson, Philip |
| Corsicana Medical Research, PLLC,<br>Suite #165, 301 Hospital Drive,<br>Corsicana, Texas, 75110, United<br>States*          | Quorum Review Institutional<br>Review Board, Suite 1000, 1601<br>Fifth Avenue, Seattle, 98101,<br>United States<br><br>Chairperson: Simpson, Philip |

| <b>Description of Research Facility,<br/>Hospital/ Institution, and Address</b>                                                        | <b>Name of IEC/INSTITUTIONAL<br/>REVIEW BOARD Committee,<br/>Address, Committee Chair</b>                                                           |
|----------------------------------------------------------------------------------------------------------------------------------------|-----------------------------------------------------------------------------------------------------------------------------------------------------|
| Allergy and Asthma Care Center of<br>Southern CA, Suite 209, 3816<br>Woodruff Avenue, Long Beach,<br>California, 90808, United States* | Quorum Review Institutional<br>Review Board, Suite 1000, 1601<br>Fifth Avenue, Seattle, 98101,<br>United States<br><br>Chairperson: Simpson, Philip |
| Clinical Research Consortium, Suite<br>103, 4275 South Burnham, Las<br>Vegas, Nevada, 89119, United<br>States                          | Quorum Review Institutional<br>Review Board, Suite 1000, 1601<br>Fifth Avenue, Seattle, 98101,<br>United States<br><br>Chairperson: Simpson, Philip |
| Asthma & Allergy Associates, PC,<br>2709 North Tejon Street, Colorado<br>Springs, Colorado, 80907, United<br>States                    | Quorum Review Institutional<br>Review Board, Suite 1000, 1601<br>Fifth Avenue, Seattle, 98101,<br>United States<br><br>Chairperson: Simpson, Philip |

| <b>Description of Research Facility,<br/>Hospital/ Institution, and Address</b>                           | <b>Name of IEC/INSTITUTIONAL<br/>REVIEW BOARD Committee,<br/>Address, Committee Chair</b>                                                           |
|-----------------------------------------------------------------------------------------------------------|-----------------------------------------------------------------------------------------------------------------------------------------------------|
| Gordon D. Raphael, MD, Suite 202,<br>4915 Auburn Avenue, Bethesda,<br>Maryland, 20814,United States       | Quorum Review Institutional<br>Review Board, Suite 1000, 1601<br>Fifth Avenue, Seattle, 98101,<br>United States<br><br>Chairperson: Simpson, Philip |
| Toledo Institute of Clinical Research<br>7247 West Central Avenue, Toledo,<br>Ohio, 43617, United States* | Quorum Review Institutional<br>Review Board, Suite 1000, 1601<br>Fifth Avenue, Seattle, 98101,<br>United States<br><br>Chairperson: Simpson, Philip |

| Description of Research Facility, Hospital/ Institution, and Address                                                  | Name of IEC/INSTITUTIONAL REVIEW BOARD Committee, Address, Committee Chair                                                                 |
|-----------------------------------------------------------------------------------------------------------------------|--------------------------------------------------------------------------------------------------------------------------------------------|
| Sunset Medical Research, 990 Napoleon Avenue, Sunset, Louisiana, 70584, United States*                                | Quorum Review Institutional Review Board, Suite 1000, 1601 Fifth Avenue, Seattle, 98101, United States<br><br>Chairperson: Simpson, Philip |
| Carolina Research, 2227 Saint Matthews Road, Orangeburg, South Carolina, 29118, United States*                        | Quorum Review Institutional Review Board, Suite 1000, 1601 Fifth Avenue, Seattle, 98101, United States<br><br>Chairperson: Simpson, Philip |
| Innovative Research of West Florida, Inc., 1573 South Fort Harrison Avenue, Clearwater, Florida, 33756, United States | Quorum Review Institutional Review Board, Suite 1000, 1601 Fifth Avenue, Seattle, 98101, United States<br><br>Chairperson: Simpson, Philip |



| Description of Research Facility,<br>Hospital/ Institution, and Address                                                         | Name of IEC/INSTITUTIONAL<br>REVIEW BOARD Committee,<br>Address, Committee Chair                                                                    |
|---------------------------------------------------------------------------------------------------------------------------------|-----------------------------------------------------------------------------------------------------------------------------------------------------|
| Allergy and Asthma Physicians of<br>Central KY, Suite 150, 166<br>Pasadena Drive, Lexington,<br>Kentucky, 40503, United States* | Quorum Review Institutional<br>Review Board, Suite 1000, 1601<br>Fifth Avenue, Seattle, 98101,<br>United States<br><br>Chairperson: Simpson, Philip |

\*No Subjects Enrolled

All centres participated in the study under the US IND.
